# Supplementary material for: An EGFR Co-Amplified and De Novo Long Noncoding RNA HELDR Promotes Glioblastoma Malignancy through KAT7-Driven Gene Programs
Source: Research Square preprint supplement (doi:10.21203/rs.3.rs-6456987/v1), 2025-06-24
Supplement: Supplementary file 1 [file 1565ab32c2488bd18840ff2c.docx]

**Supplementary Data**

**An EGFR Co-Amplified and De Novo Long Noncoding RNA HELDR Promotes Glioblastoma Malignancy through KAT7-Driven Gene Programs**

Xiaozhou Yu1, Xiao Song1, Richard A Schäfer2, Qingshu Meng2, Deanna Tiek1, Runxin Wu1, Qiu He1, Maya Walker1, Qi Cao2, Rendong Yang2, Bo Hu1*, and Shi-Yuan Cheng1*

1The Ken & Ruth Davee Department of Neurology, The Lou and Jean Malnati Brain Tumor Institute, The Robert H. Lurie Comprehensive Cancer Center, Simpson Querrey Institute for Epigenetics, Northwestern University Feinberg School of Medicine, Chicago, IL 60611, USA

2Department of Urology, Northwestern University Feinberg School of Medicine, Department of Urology & Robert H. Lurie Comprehensive Cancer Center, Northwestern University Feinberg School of Medicine, Chicago, IL 60611.

**Contents:**

**Extended Data Fig. 1,** **Related to Fig. 1.** The lncRNA *ELDR* is co-amplified with *EGFR* in GBM.

**Extended Data Fig. 2.** **Related to Fig. 2.** De novo lncRNA *HELDR* is the major transcript in the *ELDR* locus and localized in the nucleus.

**Extended Data Fig. 3.** **Related to Fig. 3.** *HELDR* is critical for cell proliferation and tumorigenicity and globally regulates gene expression independent of EGFR in GSCs with *EGFR* amplification.

**Extended Data Fig. 4.** **Related to Fig. 4.** *HELDR* globally binds to genomic DNA.

**Extended Data Fig. 5.** **Related to Fig. 5.** *HELDR* epigenetically regulates KAT7 expression.

**Extended Data Fig. 6.** **Related to Fig. 6.** KAT7 mediates *HELDR*-promoted GBM tumorigenesis.

**Supplementary Figure 7.** **Related to Figure 7.** KAT7 inhibitor WM-3835 synergistically enhanced anti-GBM activity of EGFR inhibitor Erlotinib.

**Supplementary Figure 8.** **Related to Figure 8.** ASO-targeting *HELDR* synergistically enhanced anti-GBM activity of EGFR inhibitor Erlotinib.

**Supplementary Figures**


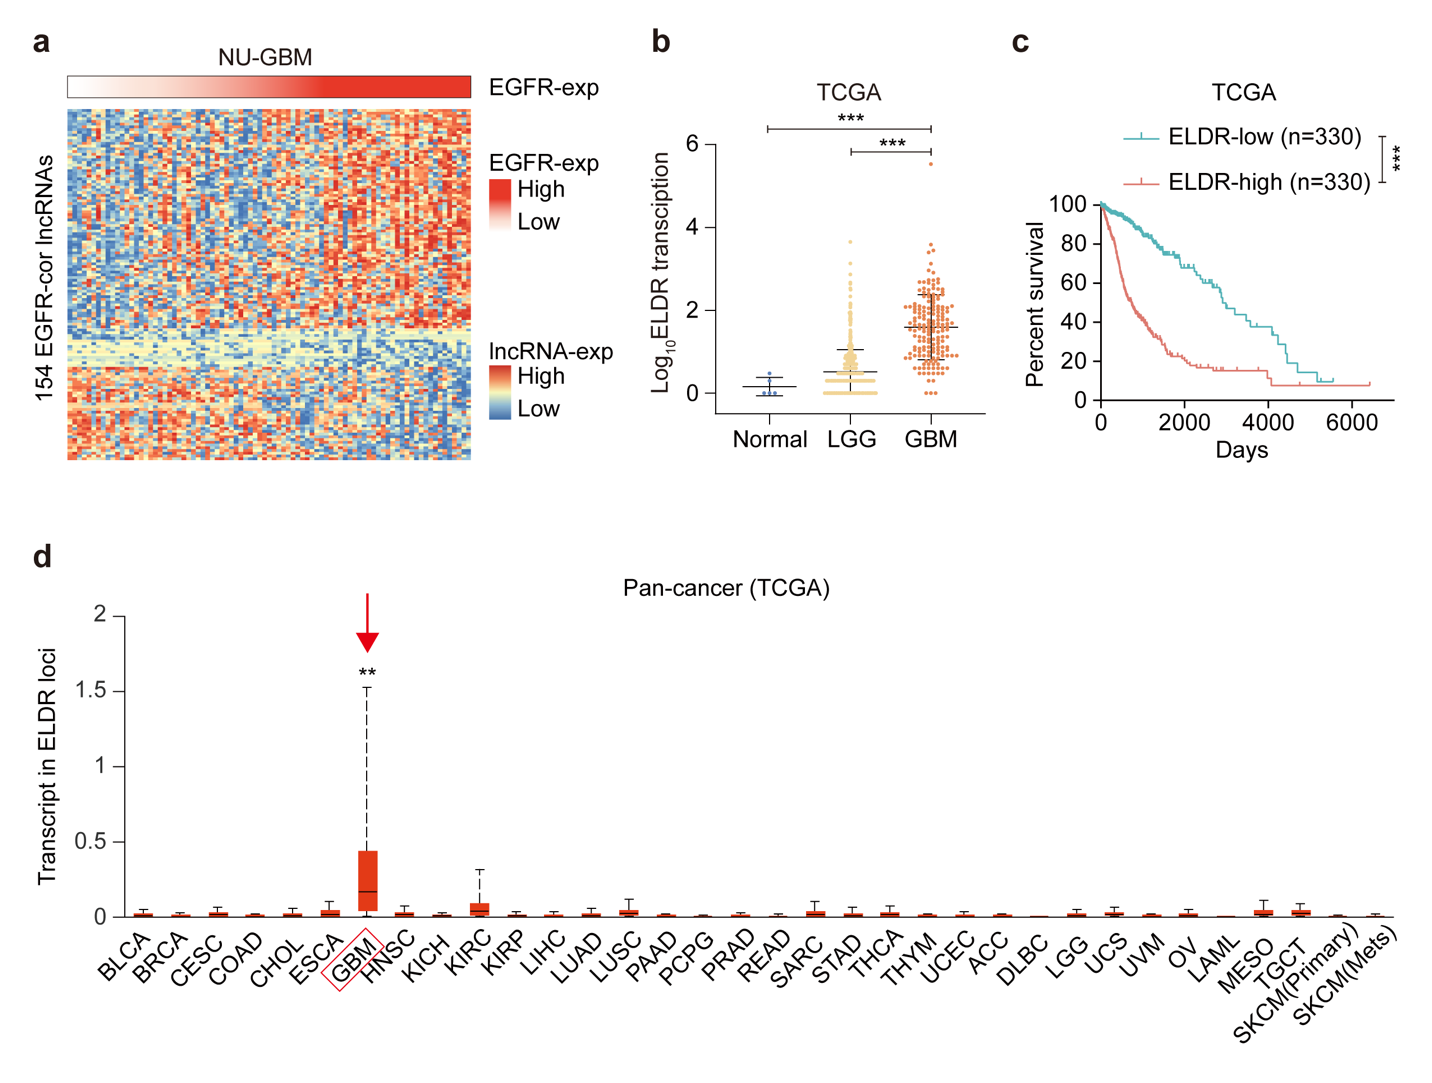


**Extended Data Fig. 1. Related to Fig. 1. *ELDR* expression is significantly elevated in clinical GBMs and correlates with poor prognosis.** **a,** Heatmap depicts expressions of 154 lncRNAs that exhibited significant correlation with *EGFR* expression in NU-GBM samples1 (Spearman method, |r| > 0.3 and p < 0.05). Expression levels of lncRNAs and *EGFR* are indicted. **b,**Expression of *ELDR* RNA in normal brain, LGG, and GBM in TCGA dataset. **c,** Kaplan-Meier analysis of *ELDR* expression in TCGA glioma samples. **d,** TCGA Pan-Cancer analysis of expression of RNA transcript at the *ELDR* locus (<https://ualcan.path.uab.edu/>). BLCA, bladder urothelial carcinoma; BRCA, breast invasive carcinoma; CESC, cervical squamous cell carcinoma and endocervical adenocarcinoma; COAD, colon adenocarcinoma; CHOL, cholangiocarcinoma; ESCA, esophageal carcinoma; GBM, glioblastoma; HNSC, head and neck squamous cell carcinoma; KICH, kidney chromophobe; KIRC, kidney renal clear cell carcinoma; KIRP, kidney renal papillary cell carcinoma; LIHC, liver hepatocellular carcinoma; LUAD, lung adenocarcinoma; LUSC, lung squamous cell carcinoma; PAAD, pancreatic adenocarcinoma; PCPG, pheochromocytoma and paraganglioma; PRAD, prostate adenocarcinoma; READ, rectum adenocarcinoma; SARC, sarcoma; STAD, stomach adenocarcinoma; THCA, thyroid carcinoma; THYM, thymoma; UCEC, uterine corpus endometrial carcinoma; ACC, adrenocortical carcinoma; DLBC, diffuse large B-cell lymphoma; LGG, low-grade glioma; UCS, uterine serous carcinoma; UVM, uveal melanoma; OV, ovarian serous cystadenocarcinoma; LAML, acute myeloid leukemia; MESO, mesothelioma; TGCT, testicular germ cell tumor; SKCM, skin cutaneous melanoma; SKCM, skin cutaneous melanoma. ****p* < 0.001, one-way ANOVA in **b**, log-rank test in **c**. Data are presented as mean ± s.d. (**b**).


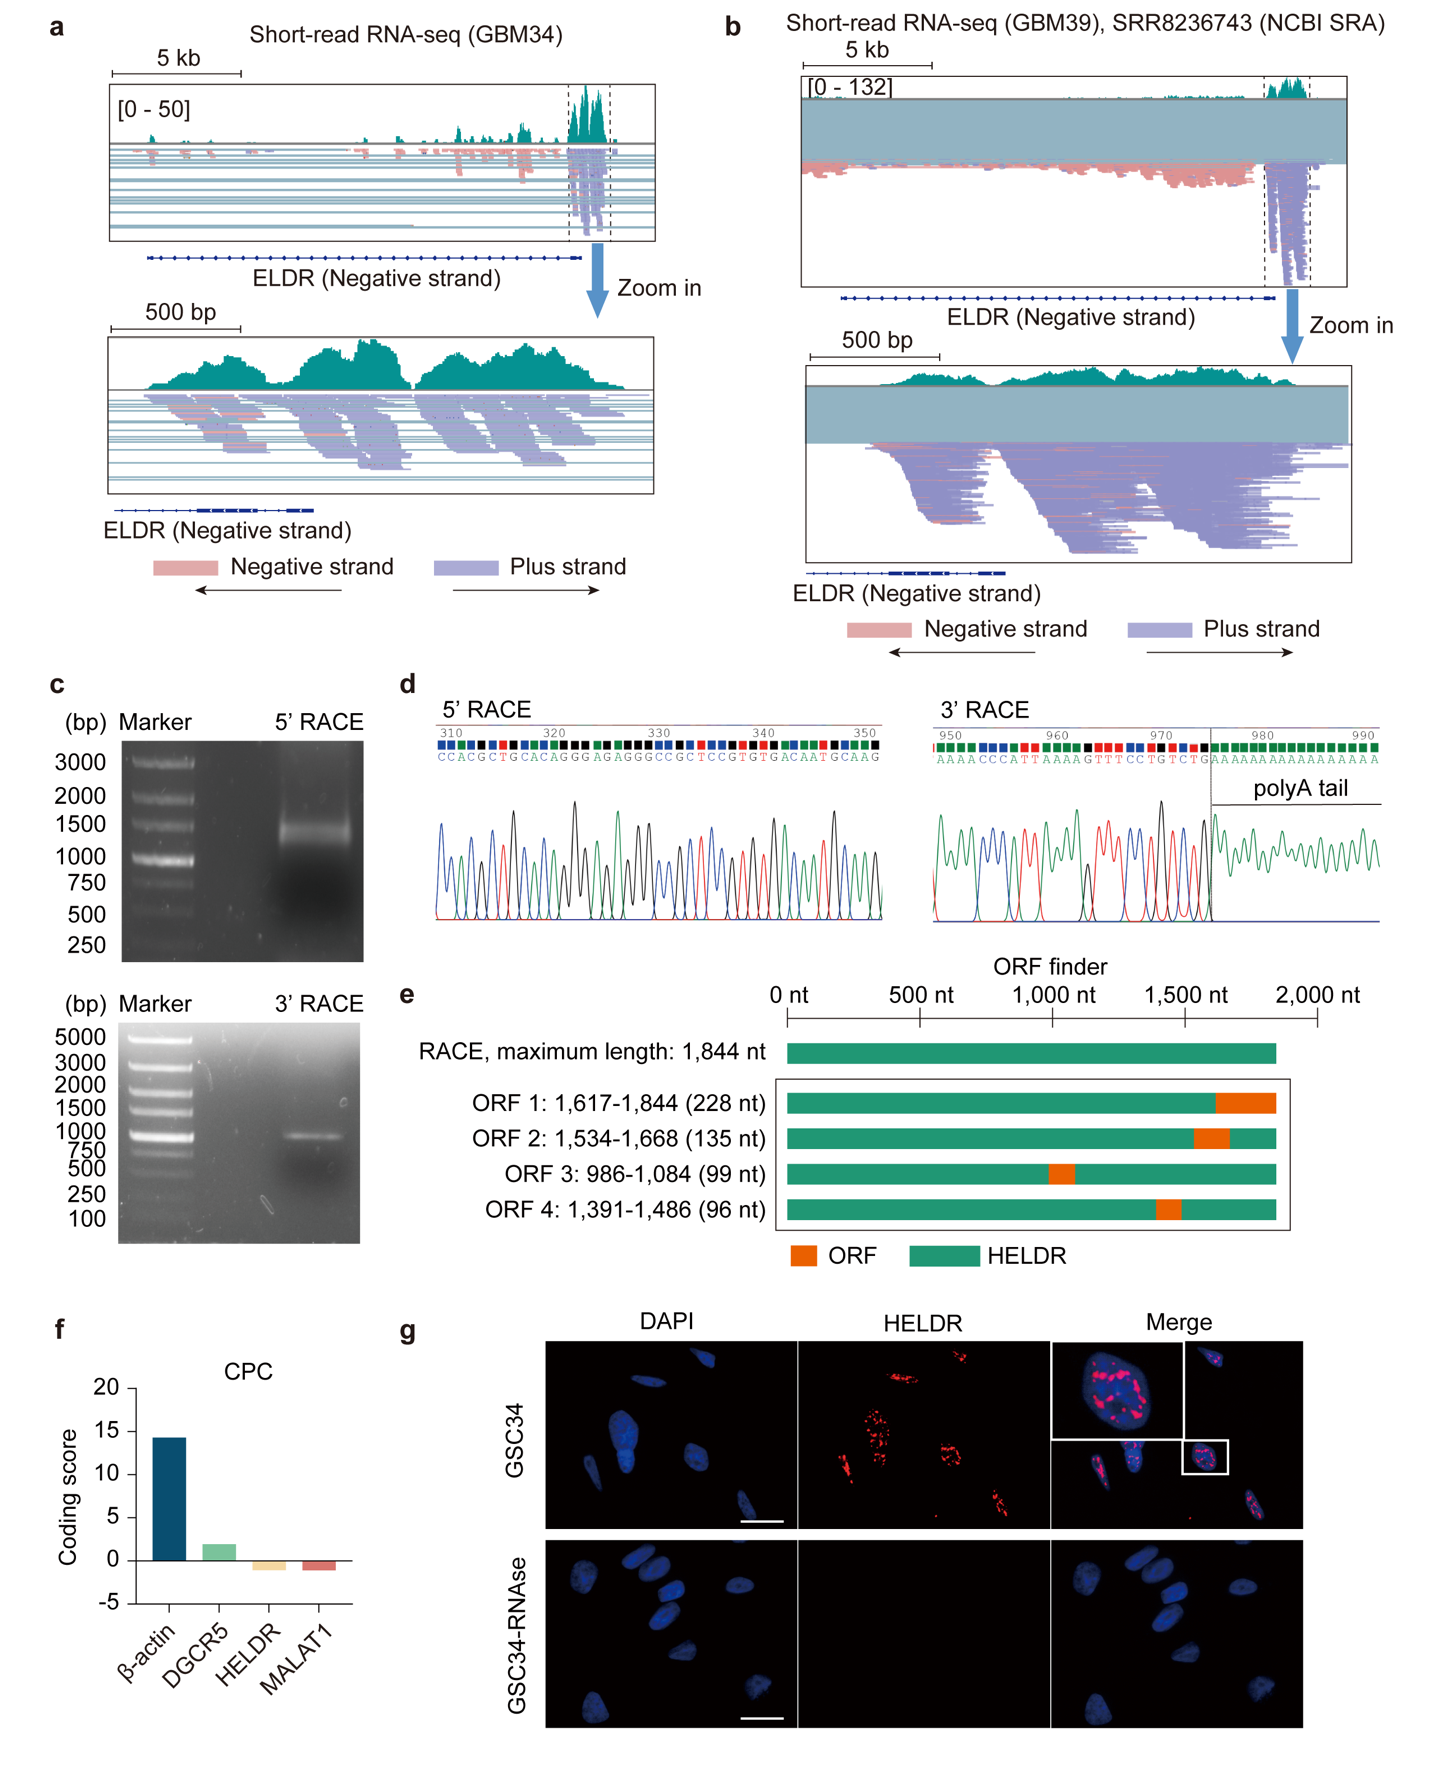


**Extended Data Fig. 2. Related to Fig. 2. De novo lncRNA *HELDR* is the major transcript in the *ELDR* locus and localized in the nucleus.** **a, b,** Integrative genomic viewer (IGV) showed short-read RNA-seq of GSC34 and GBM392 at the *ELDR* locus. Light pink and purple reads represent RNA matching indicated strands. **c,**Agarose gel electrophoresis. 5’ rapid amplification of cDNA ends (RACE) and 3’ RACE for *HELDR* transcripts in GBM6. **d,**Representative Sanger sequencing for 5’ RACE and 3’ RACE products. **e,**Open read frame (ORF) assessment by using the ORF Finder (https://www.ncbi.nlm.nih.gov/orffinder). No reliable OFR was found. **f,** Coding potential of indicated genes predicted by an online software CPC (https://cpc.gao-lab.org/). **g,** smFISH for *HELDR* in GSC34 cells. Cells treated with RNase served as a negative control. Scale bar, 20 μm.


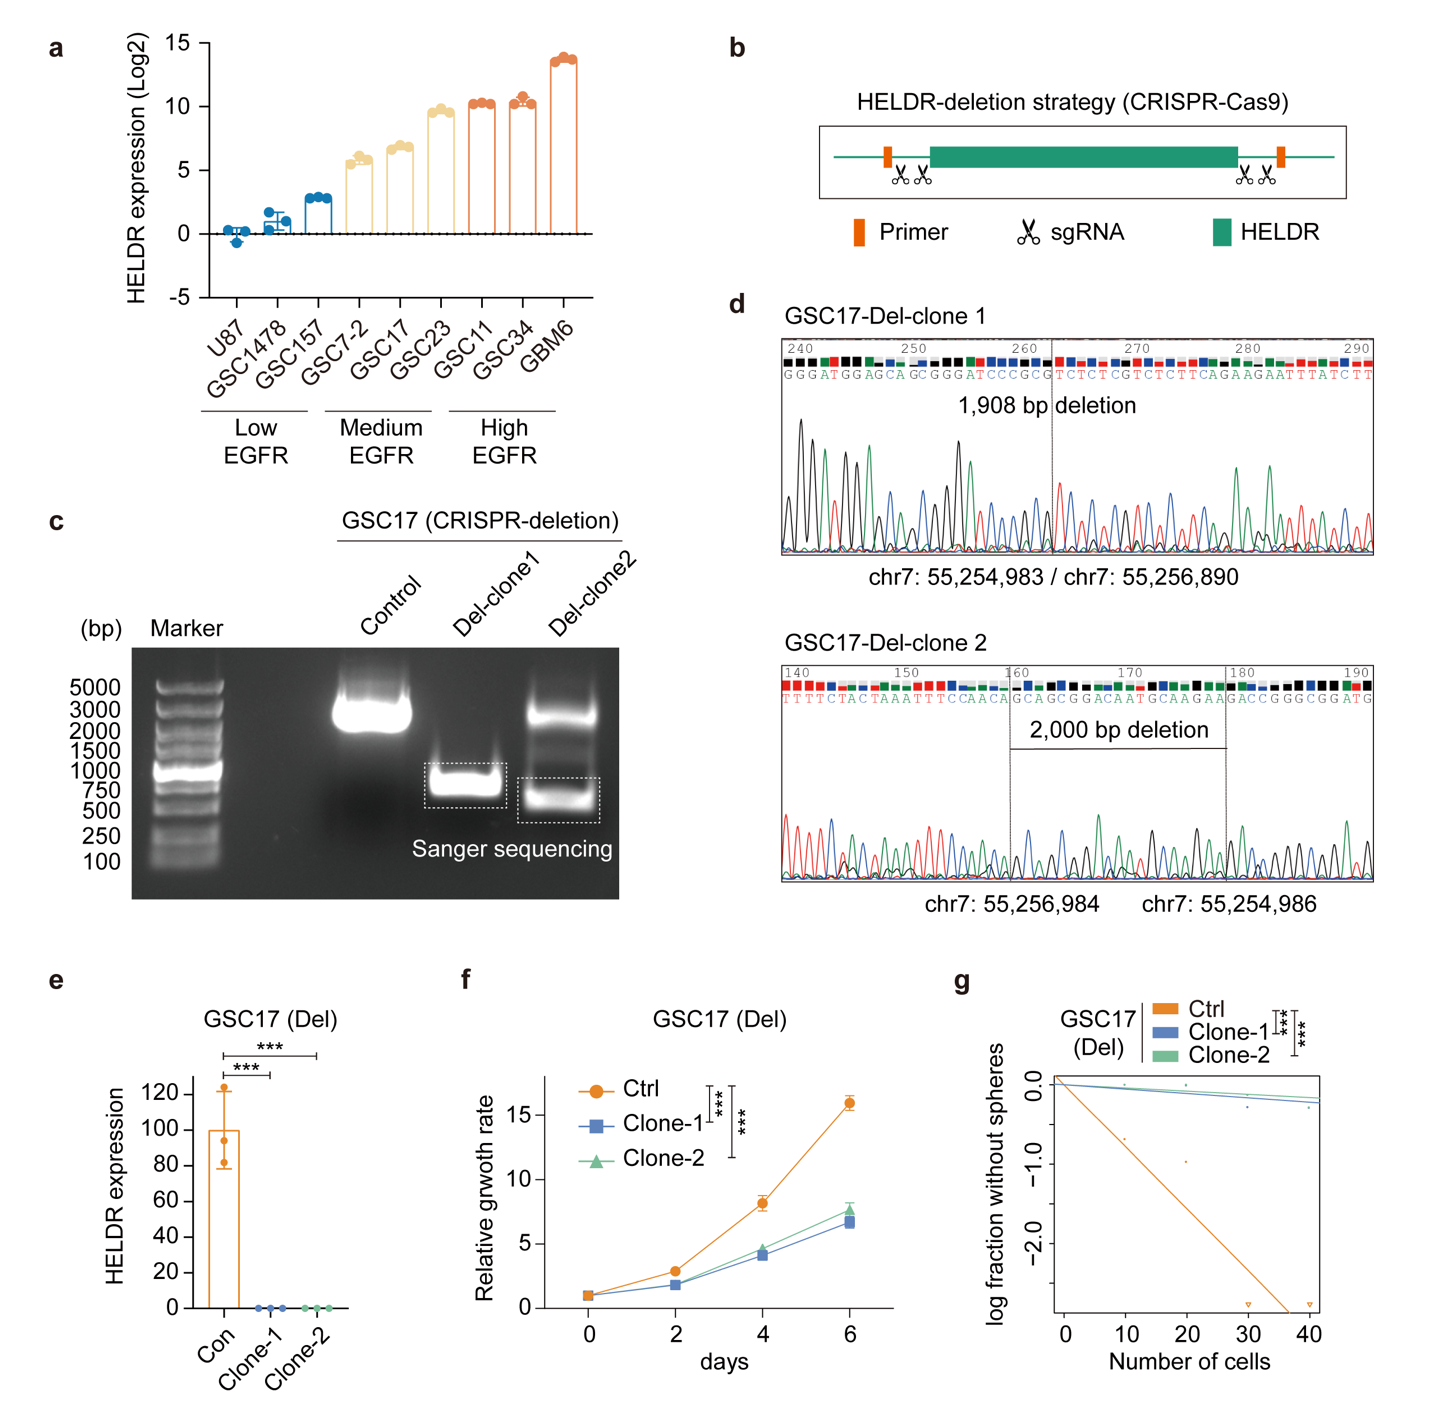


**Extended Data Fig. 3. Related to Fig. 3. HELDR expression in GBM cells and CRISPR-mediated *HELDR* deletion GSC17 cells.** **a,**qRT-PCR for *HELDR* expression in U87, patient-derived GSCs, and patient-derived xenograft (PDX) GBM6 cell lines with indicated levels of *EGFR* amplification or expression. *HELDR* was presented as the log2 of its relative expression level. Color-coded dots indicate levels of *HELDR* expression: blue, low expression, light yellow, moderate expression, and orange, high expression. **b,** CRISPR-Cas9-mediated *HELDR* deletion (Del) in GSCs. **c, d,** PCR (**c**) and Sanger sequencing (**d**) for two single clones of CRISPR/Cas9-mediated *HELDR* deletion GSC17 cells. **e,** qRT-PCR results confirmed deletion of *HELDR* in GSC17 cells. **f,** Cell proliferation for GSC17 cells with or without *HELDR* deletion. **g,** Self-renewal capacity of GSC17 cells with or without *HELDR* deletion (Del). ****p* < 0.001, one-way ANOVA in **e** and **f**, likelihood ratio test in **g**, Data are presented as mean ± s.d. (**a, e** and **f**).


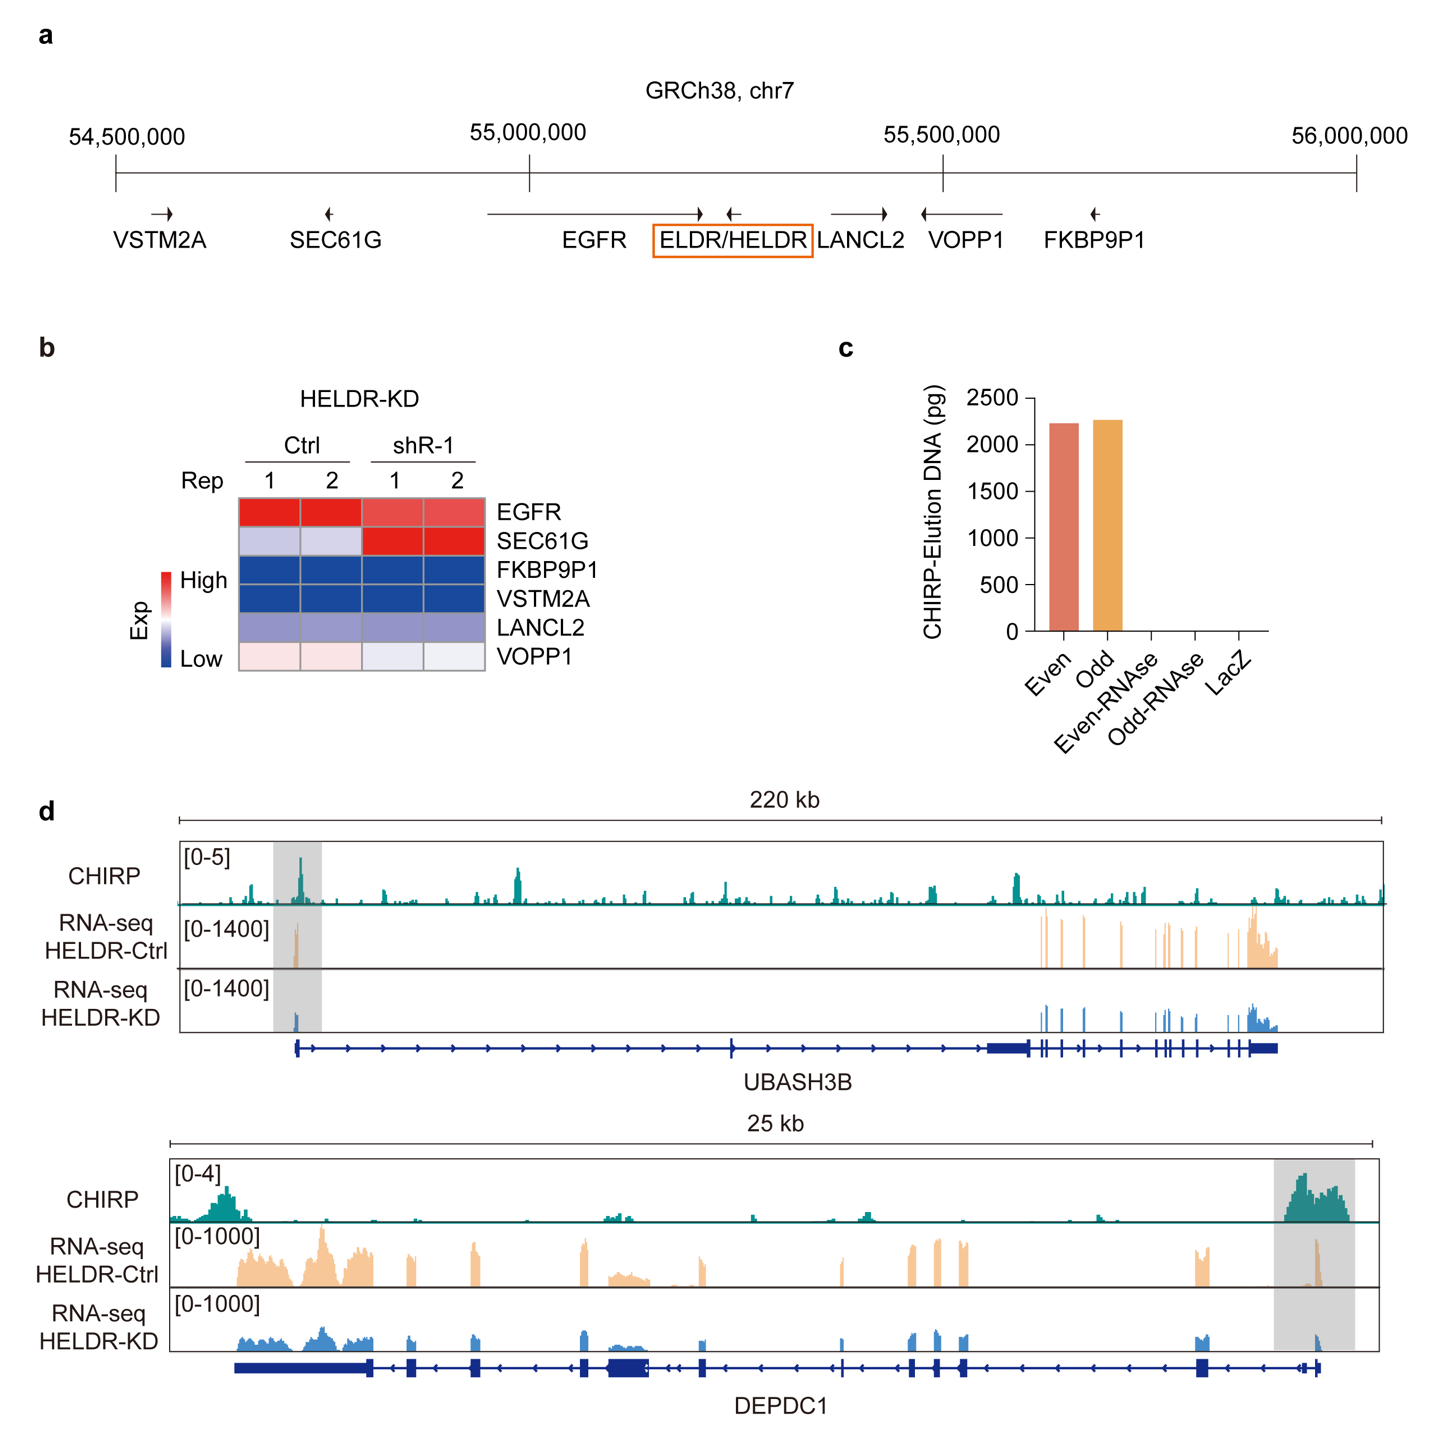


**Extended Data Fig. 4. Related to Fig. 4. *HELDR* does not regulate *EGFR* transcription but epigenetically activates other genes.** **a,** Diagram of *EGFR, ELDR/HELDR* gene locus and nearby genes in Chromosome (Chr) 7 genomic DNA3-5 or ecDNAs2,6 in GBM. **b,** Heatmap of indicated genes at *EGFR, ELDR/HELDR* gene loci in GBM ecDNAs in GSC17 cells with or without *HELDR* KD. **c,** Quantification of ChIRP-eluted DNA at indicated conditions. Even and odd, probe pools with even-numbered or odd-numbered probes targeting the HELDR locus sequentially. LacZ, probe pools targeting Escherichia coli-expressed lacZ as negative control. **d,** Integrative genomic viewer (IGV) of two representative genes, *UBASH3B* and *DEPDC1* that were identified in *HELDR* ChIRP-seq and RNA-seq analysis. The peaks of *HELDR* ChIRP-seq in the promoter region are light-gray shaded.


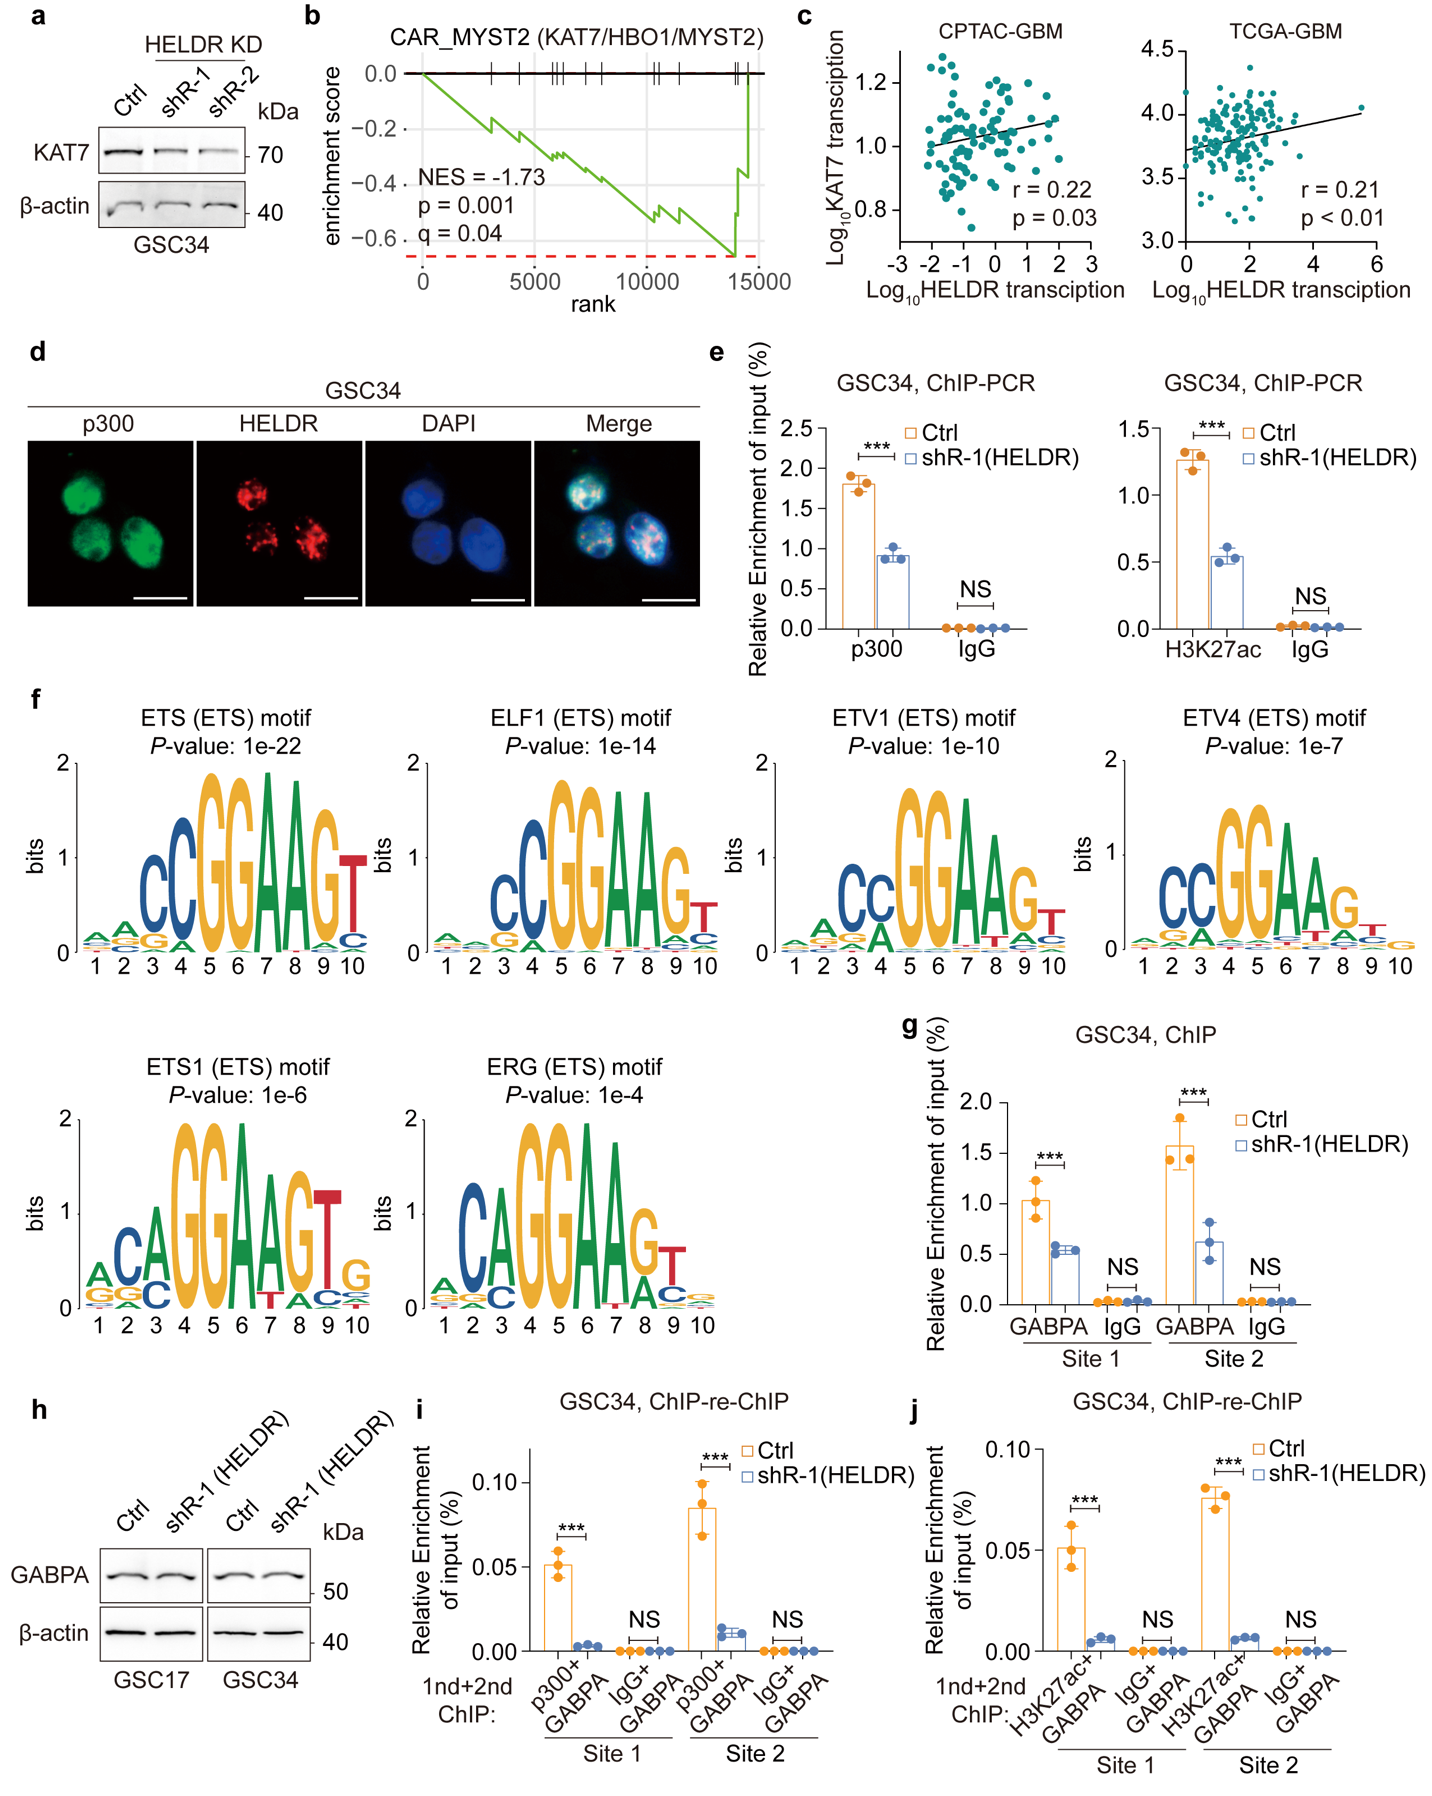


**Extended Data Fig. 5. Related to Fig. 5. *HELDR* facilitates KAT7 gene expression through recruiting ETS transcription factors and p300 to the KAT7 gene promoter. Related to Fig. 5.** **a,** IB for KAT7 protein expression in GSC34 cells with or without *HELDR* KD. **b,** GSEA for significantly DEGs (|FC| < 2, padj < 0.05) induced by *HELDR* KD in GSC17 cells. **c,** Gene correlation analysis (Spearman method) of *HELDR* and KAT7 genes in CPTAC and TCGA GBM samples. **d,** Images of smFISH (HELDR) and IF (p300) in GSC34 cells. **e,**ChIP-qPCR. Enrichment of p300 (left) and H3K27ac (right) at the *KAT7* gene promoter in GSC34 cells with or without *HLEDR* KD. IgG is a control. **f,** Sequence logo plot of ETS family member-binding motif that are enriched in *HELDR* ChIRP-seq. **g,** ChIP-qPCR. Enrichment of GABPA at *KAT7* gene promoters were compared in GSC34 cells with or without *HELDR* KD. IgG is a control. **h,** IB. for GABPA protein expression in GSC17 (left) and GSC34 (right) with or without *HELDR* KD. **i, j,** ChIP-re-ChIP-qPCR. Enrichment of P300/GABPA or H3K27ac/GABPA complexes at *KAT7* gene promoters were compared in GSC34 cells with or without *HELDR* KD. The first ChIP was performed with p300, H3K27ac, or IgG, followed by a second ChIP using GABPA. IgG is a control in (**i** to **j**). Scale bar, 10 μm. NS, not significant; ****p* < 0.001, unpaired Student’s *t*-tests in **e, g, i** and **j**, Data are presented as mean ± s.d. (**e, g, i** and **j**).


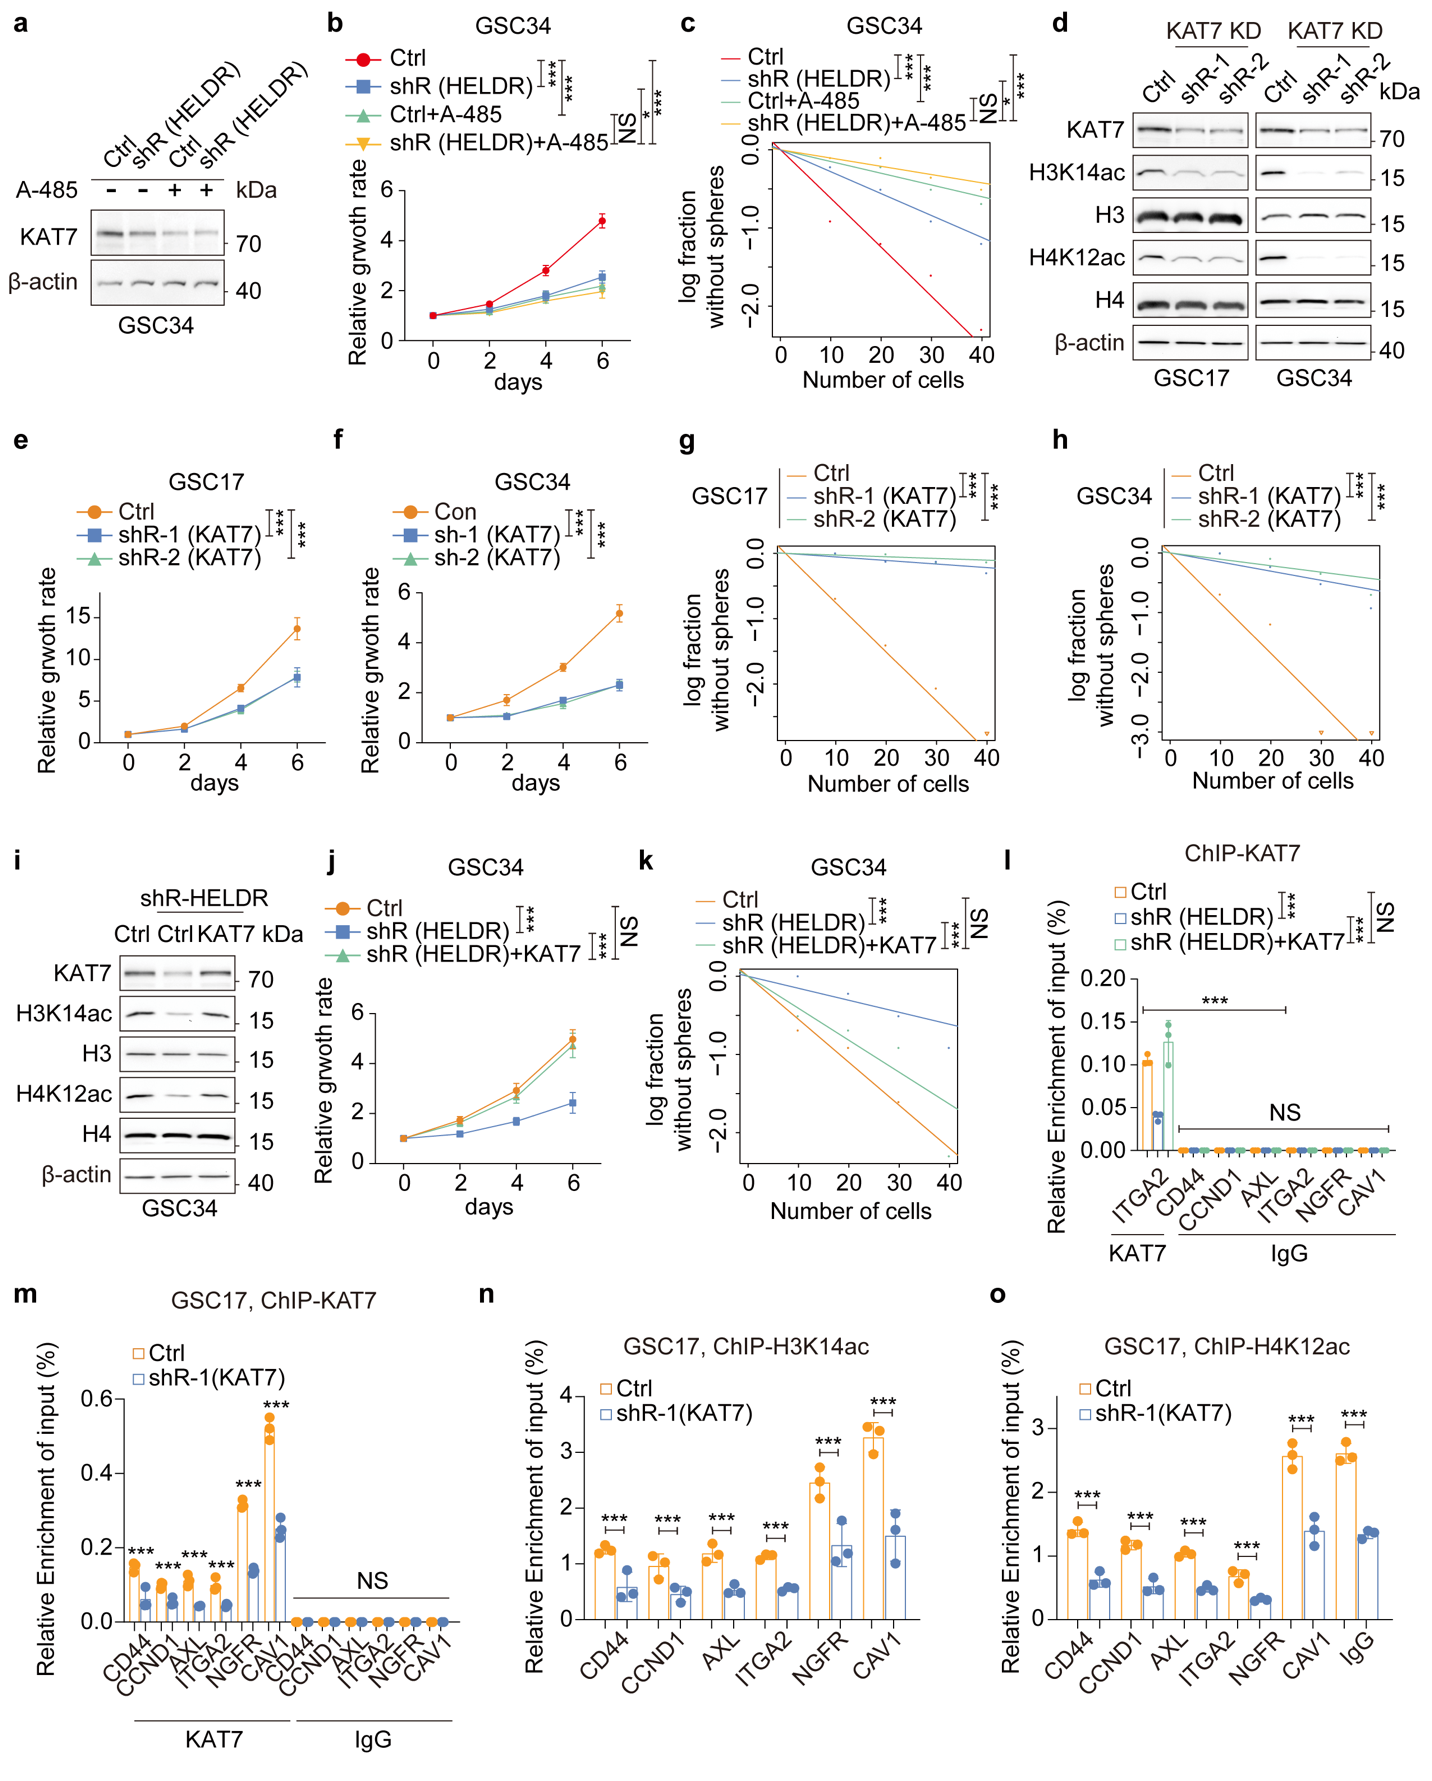


**Extended Data Fig. 6. Related to Fig. 6. KAT7 mediates *HELDR*-promoted GBM tumorigenesis by inducing transcriptions of genes that critical for GBM malignancy.** **a-c**, Effects of ± treatment of 5 μM p300 inhibitor A-485 on KAT7 protein expression (**a**,IB, treatment for three days*),* cell proliferation (**b**) or self-renewal (glioma sphere formation, **c**) in GSC34 cells with or without *HLEDR* KD. **d,** IB. for KAT7 proteins and its substrate H3K14ac and H4K12ac in GSC17 and GSC34 cells with or without *KAT7* KD. **e-h**, KAT7 KD inhibits cell proliferation (**e, f**) and glioma sphere formation (**g, h**) in GSC17 (**e, g**) and GSC34 (**f, h**) cells. **i** to **k,** Overexpression of KAT7 rescued *HELDR* KD-suppressed KAT7 proteins and its substrate H3K14ac and H4K12ac (**i,** IB), cell proliferation (**j**), and glioma sphere formation (**k**) of GSC34 cells. **l,** ChIP-qPCR. Enrichment of KAT7 and IgG (negative control) at the promoters of indicated genes in GSC17 cells, with or without *HELDR* KD or rescue by KAT7 OE. **m**-**o,** ChIP-qPCR. Enrichment of *KAT7* (**m**), H3K14ac (**n**), and H4K12AC (**o**) at the promoters of indicated genes in GSC34 cells with or without *HELDR* KD. NS, not significant; **p* < 0.05, ****p* < 0.001, one-way ANOVA in **b, e, f, j** and **l**, likelihood ratio test in **c, g, h** and **k**, unpaired Student’s *t*-tests in **m**, **n** and **o**. Data are presented as mean ± s.d. (**b, e, f, j, l, m, n** and **o**).


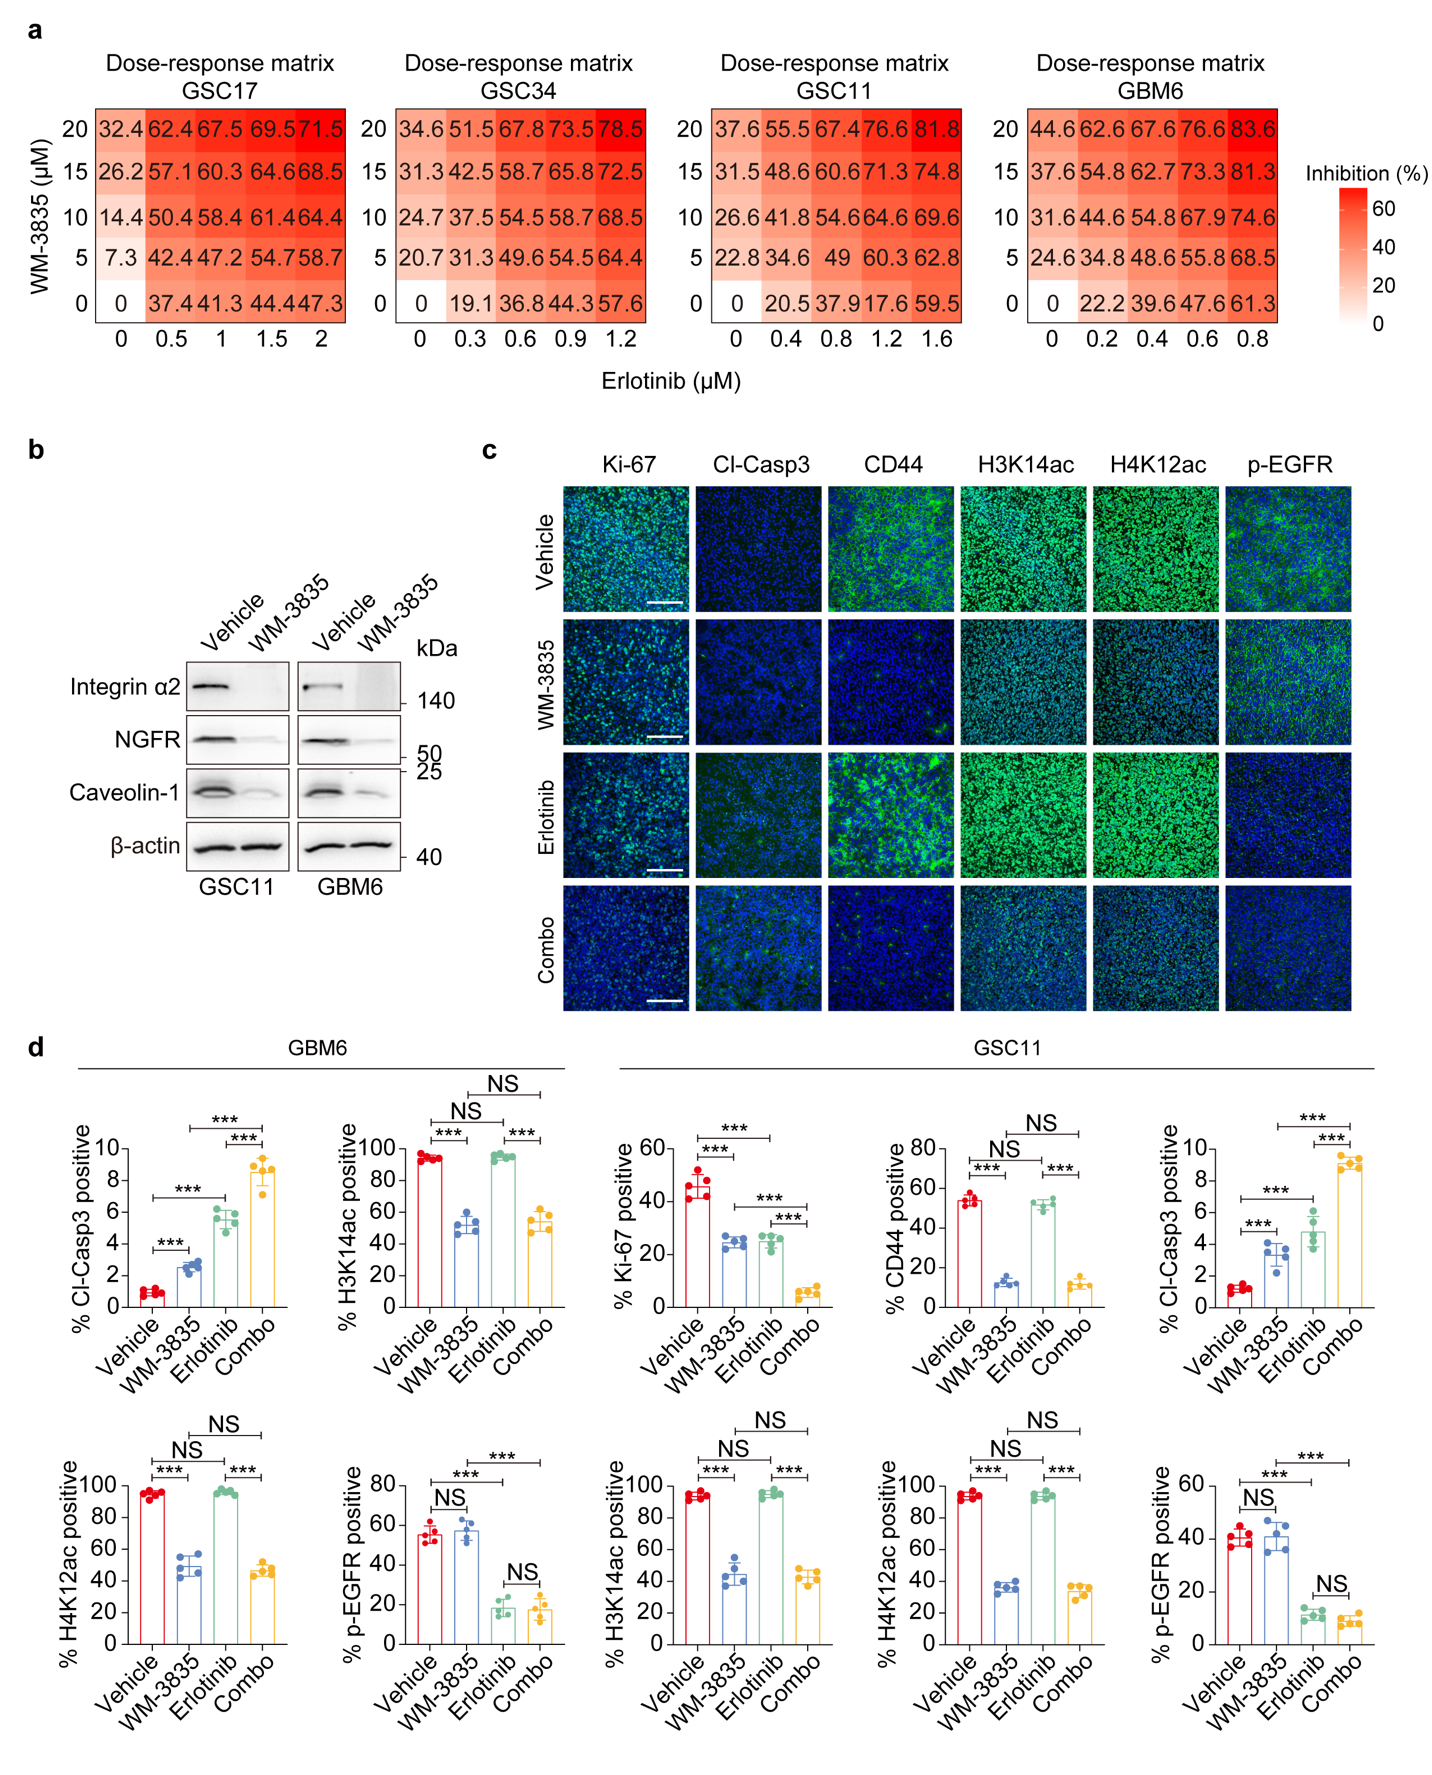


**Extended Data Fig. 7. Related to Fig. 7. KAT7 inhibitor WM-3835 synergistically enhanced anti-GBM activity of EGFR inhibitor Erlotinib.** **a,** Cell inhibition rates for combinations of various concentrations of KAT7 inhibitor (WM-3835) and EGFR inhibitor (Erlotinib) are presented in the matrix. Data was acquired by cell viability assays. **b,** IB for indicated protein expressions in GSC11 or GBM6 cells treated with vehicle or WM-3835 for 72 h. **c,** Representative images of IF staining for brain sections with GBM6 xenograft tumors with indicated treatments. **d,** Quantification of IF staining for brain sections with GBM6 and GSC11 xenograft tumors. Scale bar, 100 μm. NS, not significant; ****p* < 0.001, by one-way ANOVA. Data are presented as mean ± s.d. (**d**).


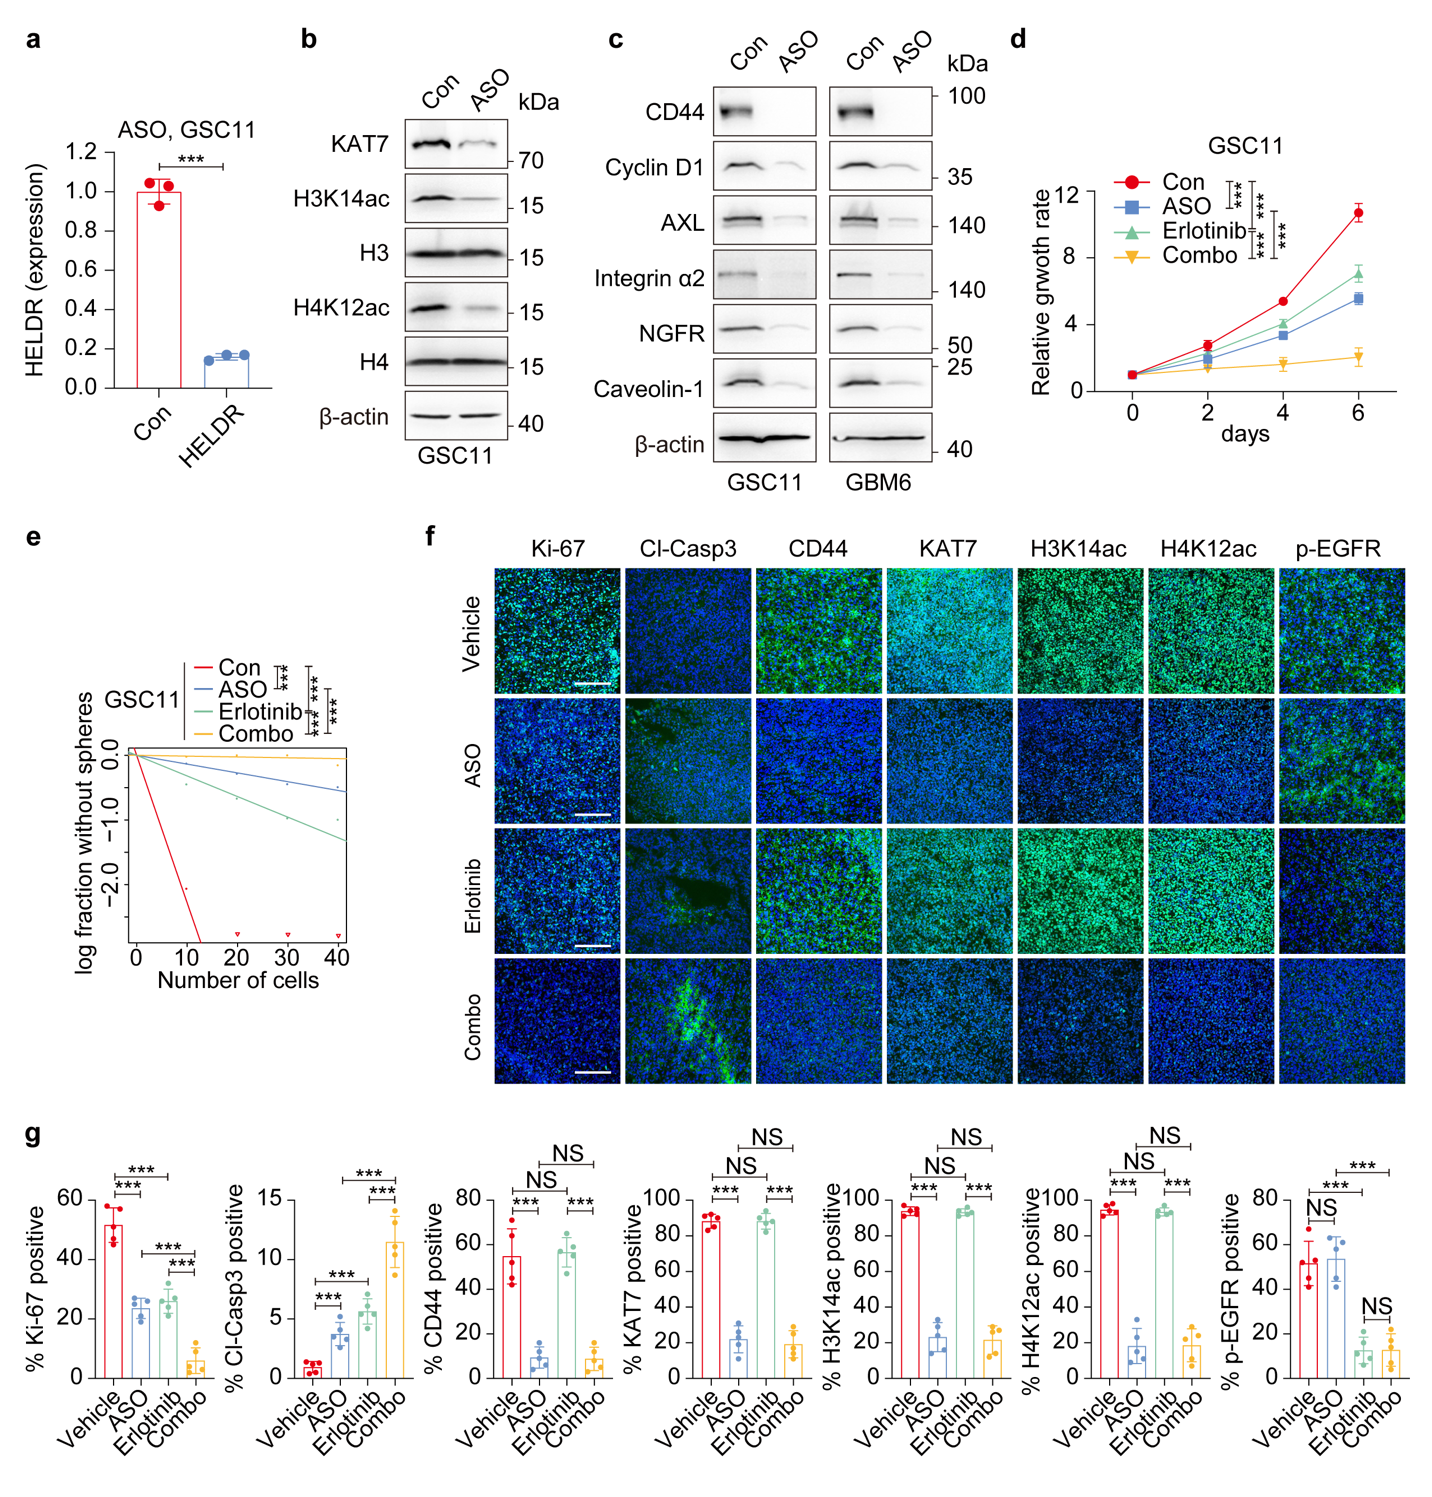


**Extended Data Fig. 8. Related to Fig. 8. ASO-mediated inhibition of *HELDR* synergistically enhanced anti-GBM activity of EGFR inhibitor Erlotinib.** **a,** qRT-PCR analysis of GSC11 cells 24 h after transfection with 100 nM control or *HELDR*-targeting ASO in vitro. **b, c,** IB for indicated proteins in GBM6 and GSC11 cells 72 h after transfection with 100 nM control or *HELDR*-targeting ASO in vitro. **d, e,** cell proliferation (**d**), and glioma sphere formation (**e**) of GSC11 cells with indicated treatment. ASO, 100 nM; Erlotinib, 0.8 μM. **f,** Representative images of IF staining for brain sections with GBM6 xenograft tumors with indicated treatments. **g,** Quantification of IF staining shown in **f**. Scale bar, 100 μm. NS, not significant; ****p* < 0.001, unpaired Student’s *t*-tests in **a**, one-way ANOVA in **d** and **g**, likelihood ratio test in **e**, Data are presented as mean ± s.d. (**a, d** and **g**).

**References**

1. Huang, T.*, et al.* PRMT6 methylation of RCC1 regulates mitosis, tumorigenicity, and radiation response of glioblastoma stem cells. *Mol Cell* **81**, 1276-1291.e1279 (2021).

2. Wu, S.*, et al.* Circular ecDNA promotes accessible chromatin and high oncogene expression. *Nature* **575**, 699-703 (2019).

3. Wang, X.Y., Smith, D.I., Frederick, L. & James, C.D. Analysis of EGF receptor amplicons reveals amplification of multiple expressed sequences. *Oncogene* **16**, 191-195 (1998).

4. Eley, G.D.*, et al.* A chromosomal region 7p11.2 transcript map: its development and application to the study of EGFR amplicons in glioblastoma. *Neuro Oncol* **4**, 86-94 (2002).

5. Park, S. & James, C.D. ECop (EGFR-coamplified and overexpressed protein), a novel protein, regulates NF-kappaB transcriptional activity and associated apoptotic response in an IkappaBalpha-dependent manner. *Oncogene* **24**, 2495-2502 (2005).

6. Morton, A.R.*, et al.* Functional Enhancers Shape Extrachromosomal Oncogene Amplifications. *Cell* **179**, 1330-1341 e1313 (2019).
